# Supplementary material for: Conserved regulation of RNA processing in somatic cell reprogramming
Source: PubMed Central journal article supplement (PMC6357513; doi:10.1186/s12864-019-5438-2), 2019-01-31

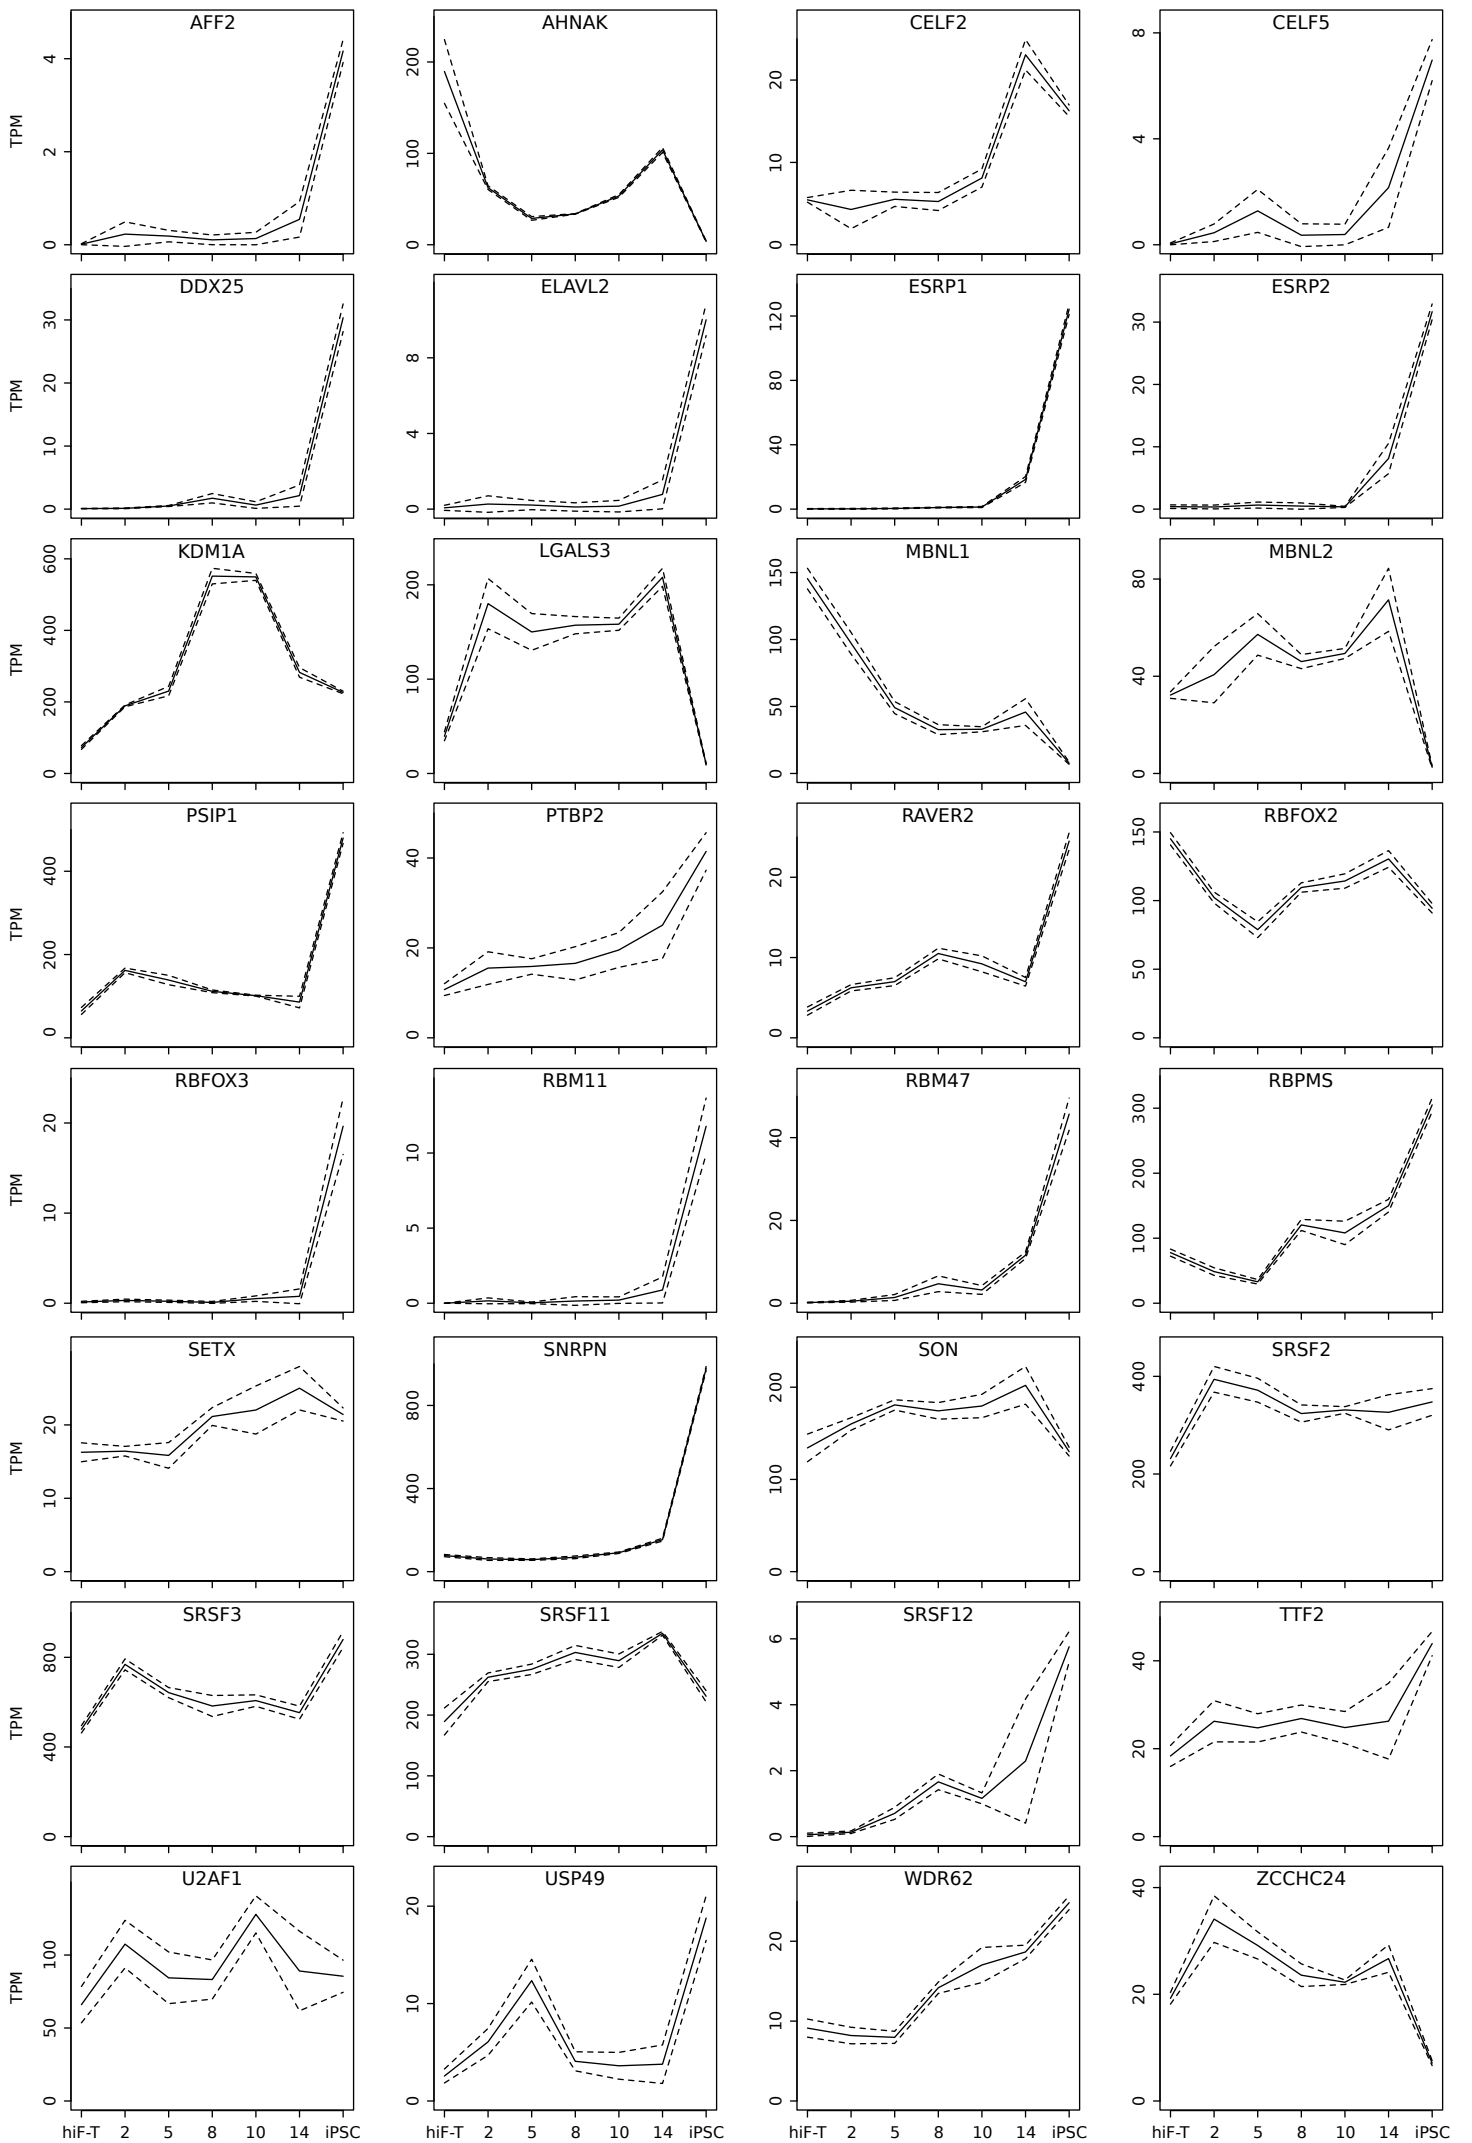

Supplement: 12864_2019_5438_MOESM6_ESM.pdf [file 12864_2019_5438_MOESM6_ESM.pdf]
