# Supplementary material for: Conserved regulation of RNA processing in somatic cell reprogramming
Source: PubMed Central journal article supplement (PMC6357513; doi:10.1186/s12864-019-5438-2), 2019-01-31
Supplement: 12864_2019_5438_MOESM9_ESM.pdf [file 12864_2019_5438_MOESM9_ESM.pdf]

A

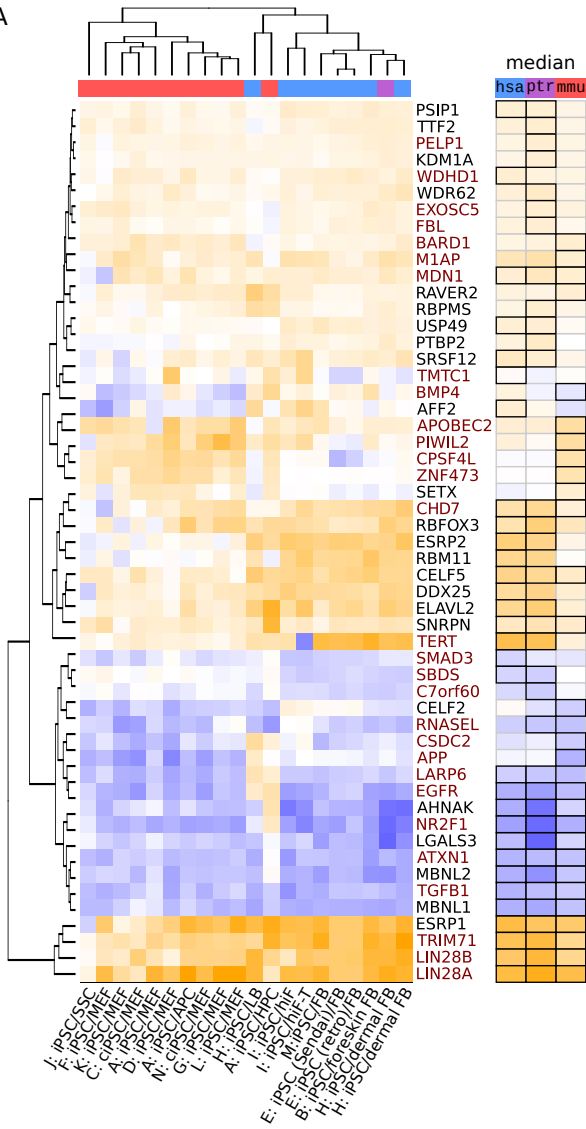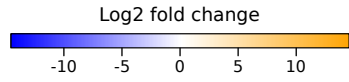

Study

- A: SRP011318
- B: SRP016568
- C: SRP026281
- D: SRP033561
- E: SRP033569
- F: SRP033700
- G: SRP045688
- H: SRP045999
- I: SRP049340
- J: SRP052014
- K: SRP056571
- L: SRP059670
- M: SRP063867
- N: SRP064357

B

Overlap analysis

| Pairing           | Fold enrichment | P value  |
|-------------------|-----------------|----------|
| hsa vs ptr        | 16.21           | 2.75e-35 |
| hsa vs mmu        | 13.33           | 1.49e-19 |
| ptr vs mmu        | 11.89           | 2.38e-18 |
| hsa vs ptr vs mmu | 264.02          | 7.06e-45 |
